# Supplementary material for: A donor–acceptor cruciform π-system: high contrast mechanochromic properties and multicolour electrochromic behavior
Source: Royal Society of Chemistry journal article supplement (doi:10.1039/c4tc00516c), 2014-01-01
Supplement: c4tc00516c1.pdf [file c4tc00516c1.pdf]

## **Supporting information**

### **Donor-Acceptor Cruciform $\pi$ -System: high contrast mechanochromic property and multicolour electrochromic behavior**

Jingwei Sun, Xiaojing Lv, Pingjing Wang, Yujian Zhang, Yuyu Dai, Qichao Wu, Mi Ouyang,\*  
and Cheng Zhang\*

*State Key Laboratory of Green Chemistry-Synthesis Technology, College of Chemical Engineering and Materials  
Science, Zhejiang University of Technology, Hangzhou, PR China. Fax: +86 579 88320027; Tel: +86 579  
88320027; E-mail: Ouyang@zjut.edu.cn (M. O.Y.); czhang@zjut.edu.cn (C. Z.)*

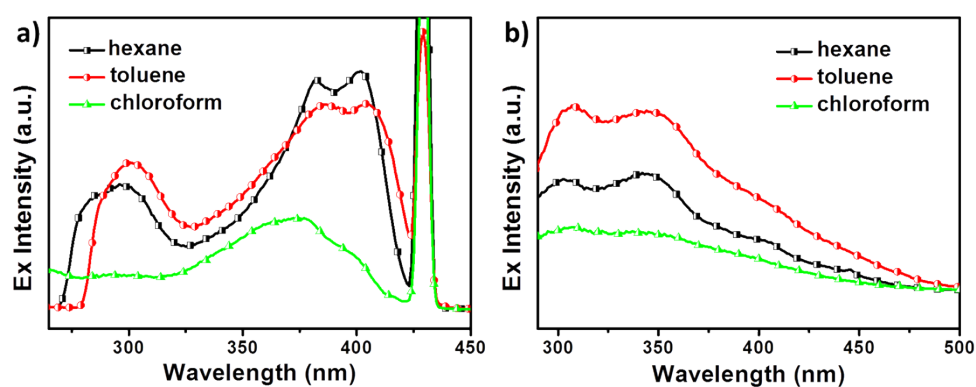

**Fig. S1** Excitation spectra of DMCS-TPA in hexane, toluene and chloroform monitored at (a) 430 nm and (b) emission maxima of CT band in different solvents respectively.

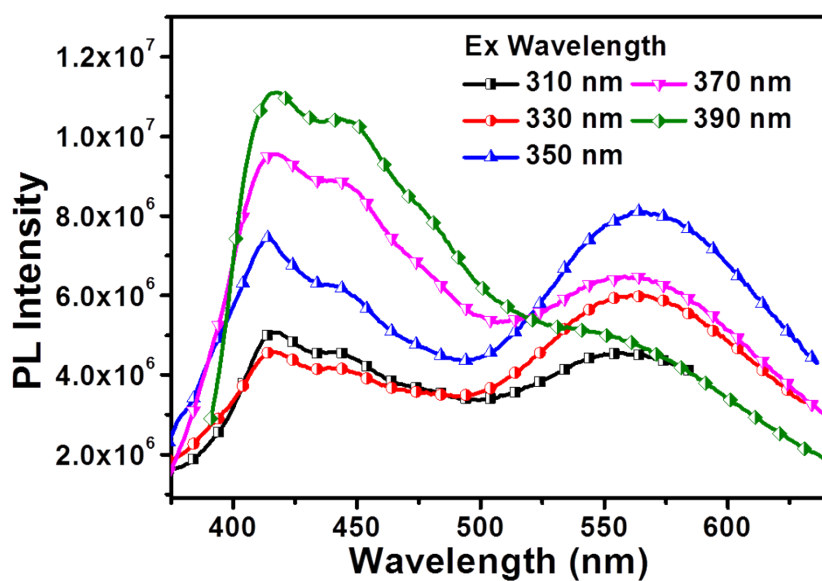

**Fig. S2** Dependence of emission spectra as function of excitation wavelength for DMCS-TPA in toluene solution.

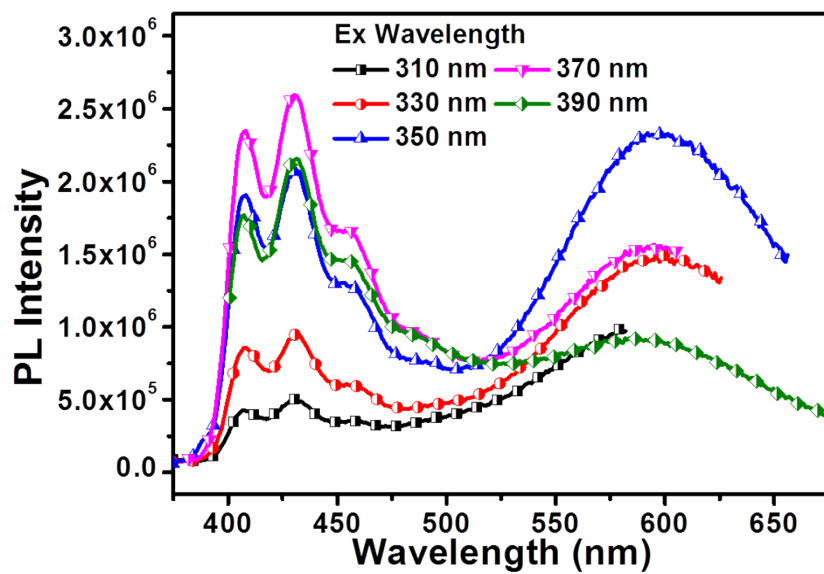

**Fig. S3** Dependence of emission spectra as function of excitation wavelength for DMCS-TPA in chloroform solution.

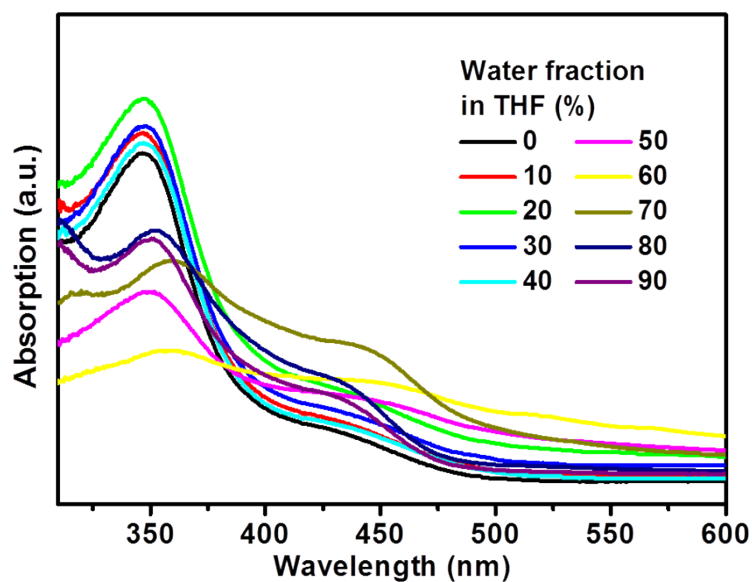

**Fig. S4** Absorption spectra of DMCS-TPA (10  $\mu$ M) in THF-water mixtures with different volume fractions of water.

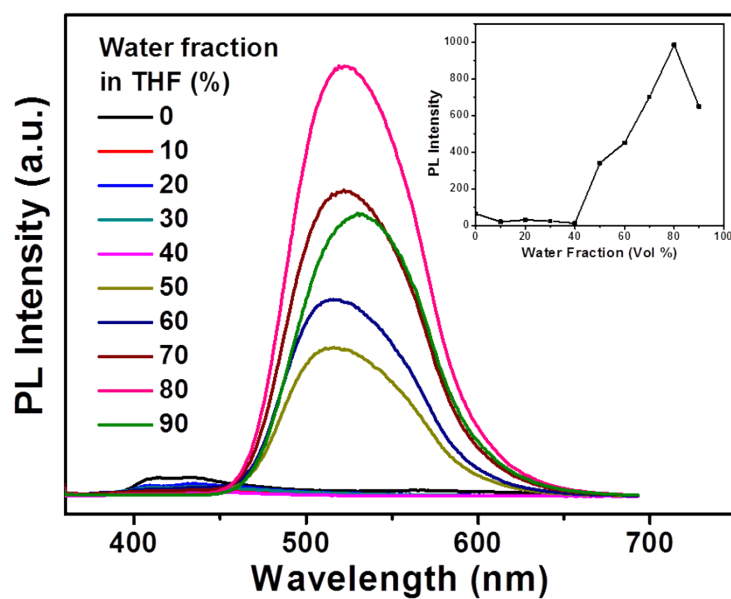

**Fig. S5** Photoluminescence (PL) spectra of DMCS-TPA (10  $\mu$ M) in THF-water mixtures with different volume fractions of water. Inset shows a plot of relative PL intensity against water content.

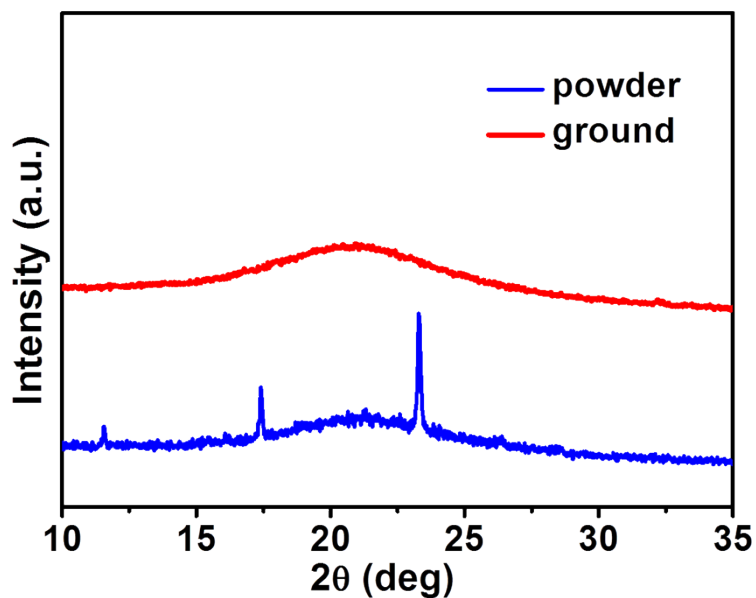

**Fig. S6** XRD profiles of DMCS-TPA before and after grinding.

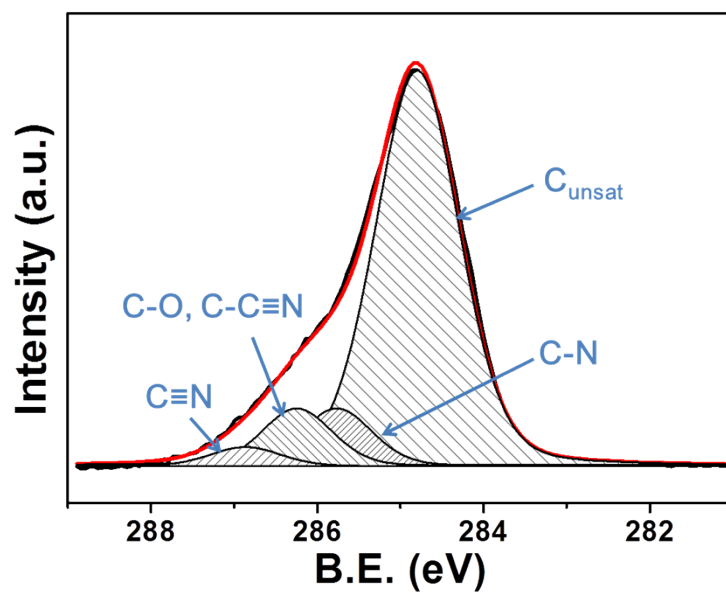

Fig. S7 XPS spectra of the C (1s) of DMCS-TPA powder before grinding.

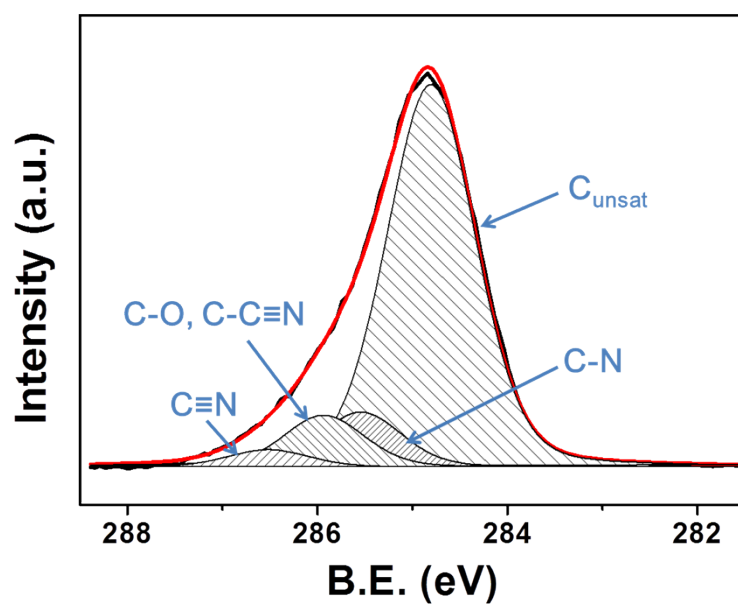

Fig. S8 XPS spectra of the C (1s) of DMCS-TPA after grinding.

**Table 1** Binding energies and percent composition for the deconvoluted XPS peaks of DMCS-TPA before and after grinding

| species            | powder  |        | ground  |        |              |
|--------------------|---------|--------|---------|--------|--------------|
|                    | BE (eV) | % area | BE (eV) | % area | % area ideal |
| C <sub>unsat</sub> | 284.80  | 77.72  | 284.80  | 77.28  | 77.42        |
| C-N                | 285.77  | 9.55   | 285.54  | 10.07  | 9.68         |
| C-O, C-C≡N         | 286.25  | 9.55   | 285.93  | 9.49   | 9.68         |
| C≡N                | 286.86  | 3.19   | 286.52  | 3.17   | 3.23         |

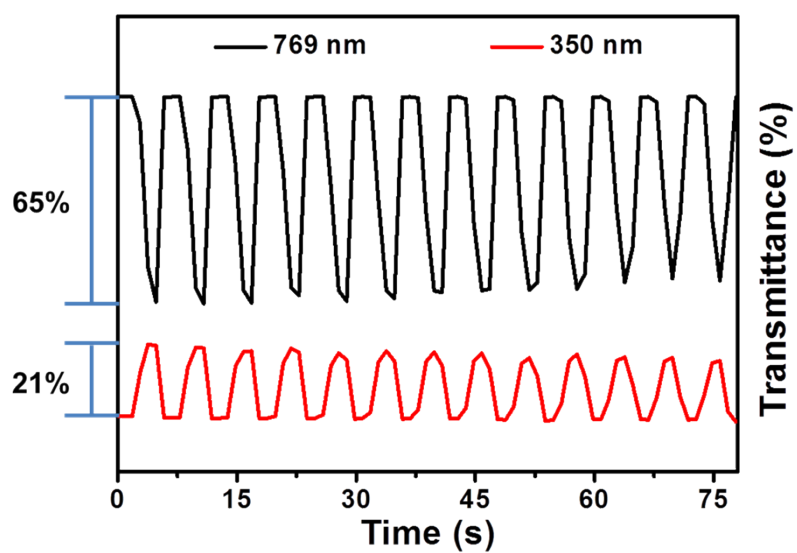

**Fig. S9** Optical contrasts of P(DMCS-TPA) film monitored at 350 and 769 nm in ACN solution containing 0.1 M TBAP between 0 and 1.45 V with a residence time of 3 s.
